# Supplementary material for: Within-host diversity improves phylogenetic and transmission reconstruction of SARS-CoV-2 outbreaks
Source: eLife journal article supplement (doi:10.7554/elife.84384), 2023-09-21

Distance from real tree

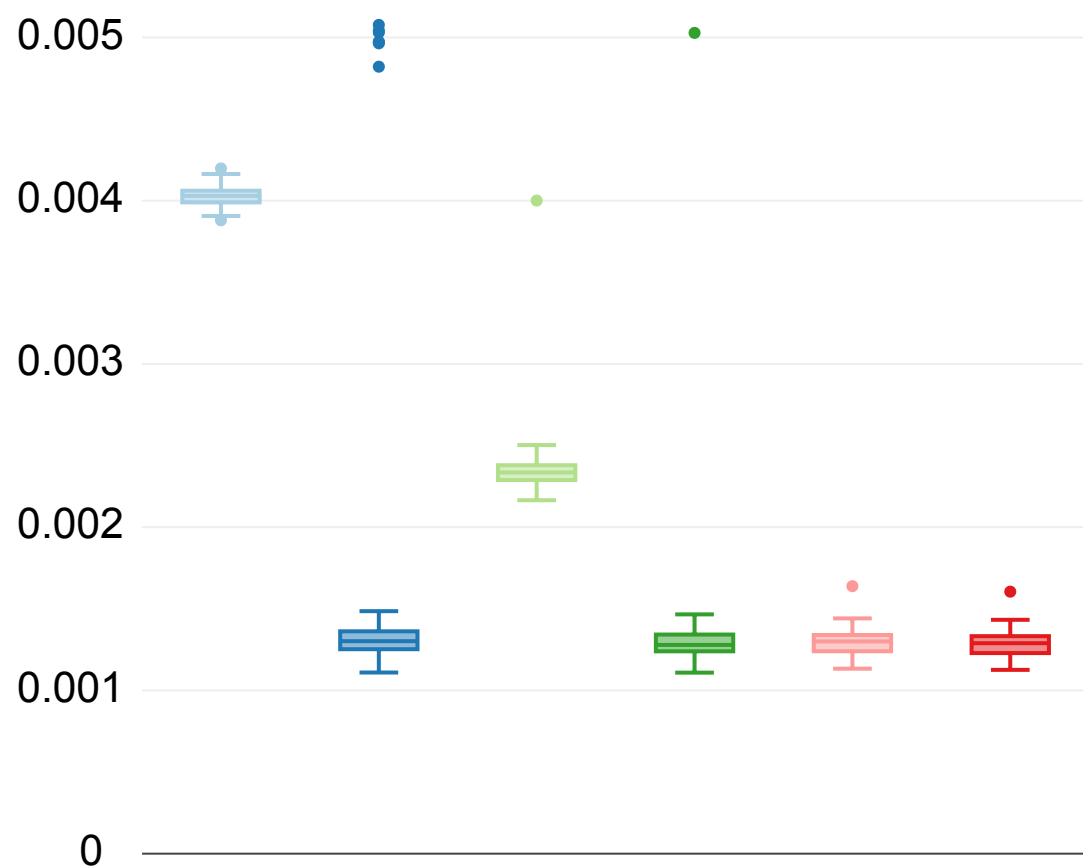

Kuhner Felsenstein

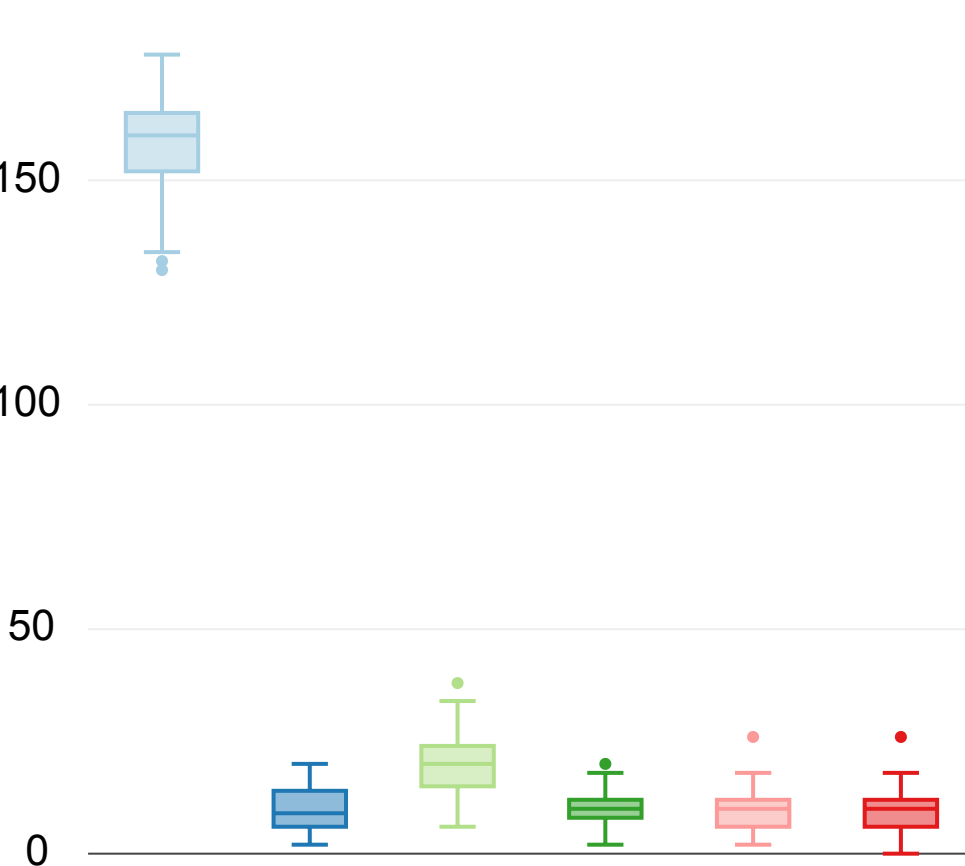

Robinson Foulds

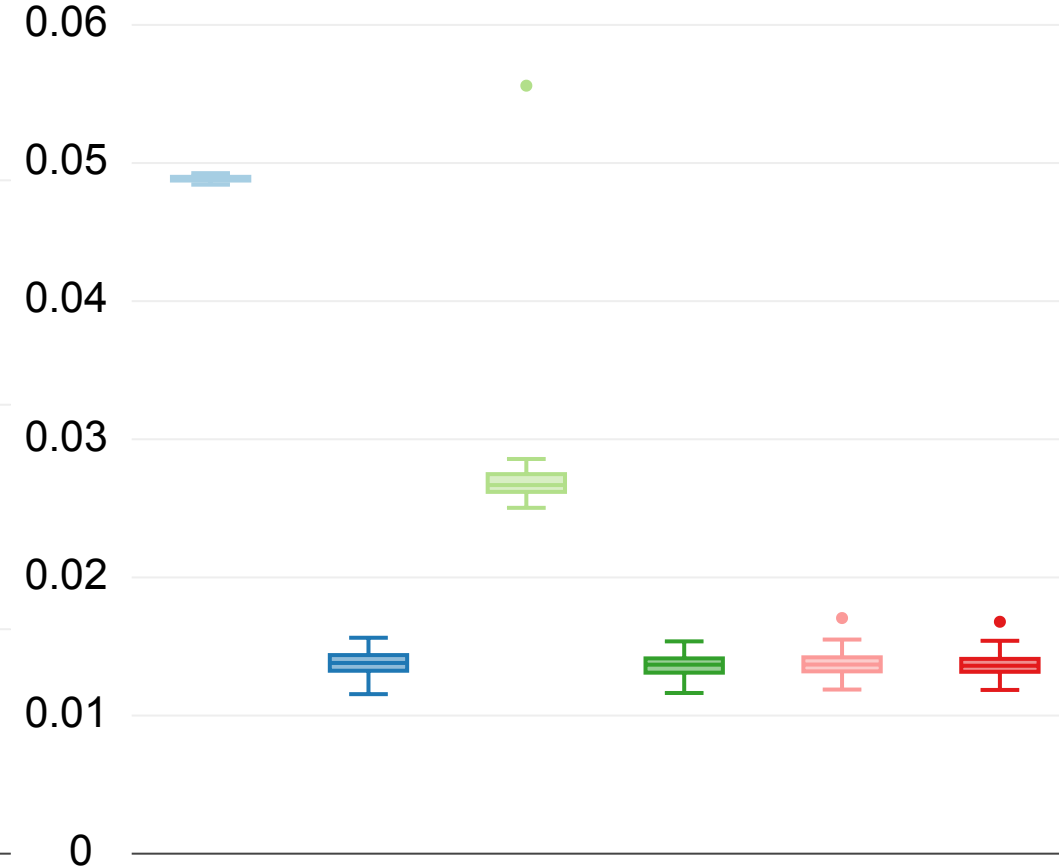

Weighted Robinson Foulds

Distance from real tree

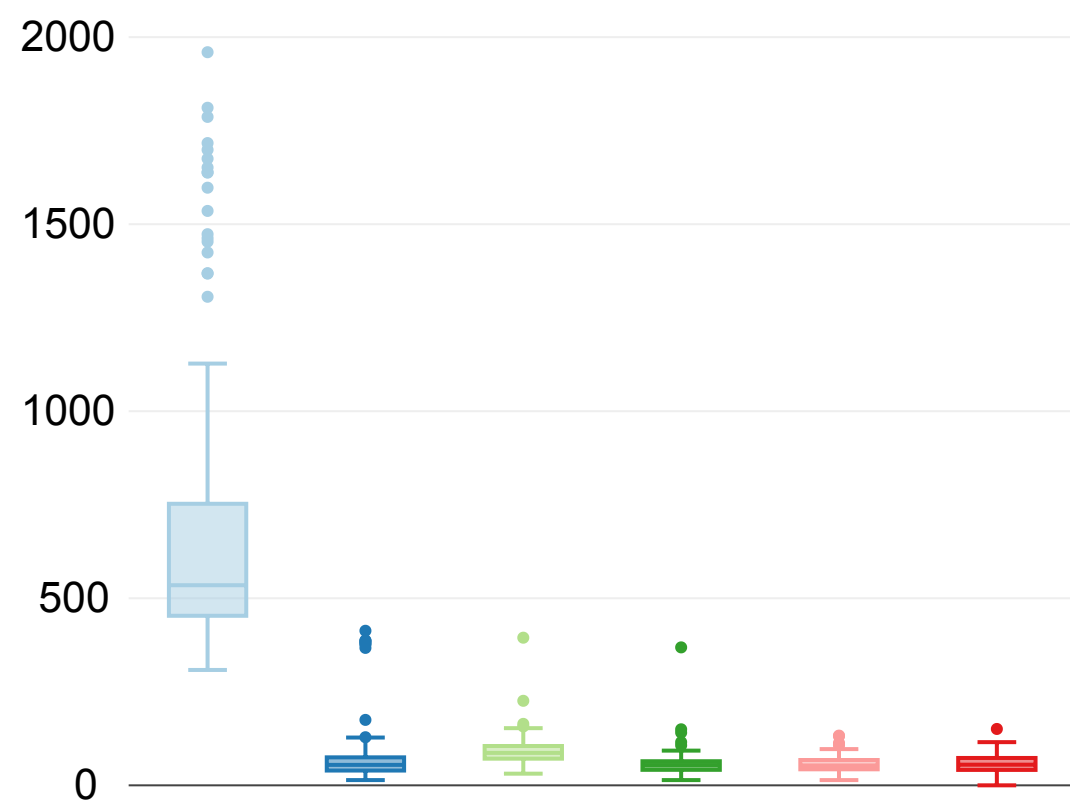

Steel and Penny

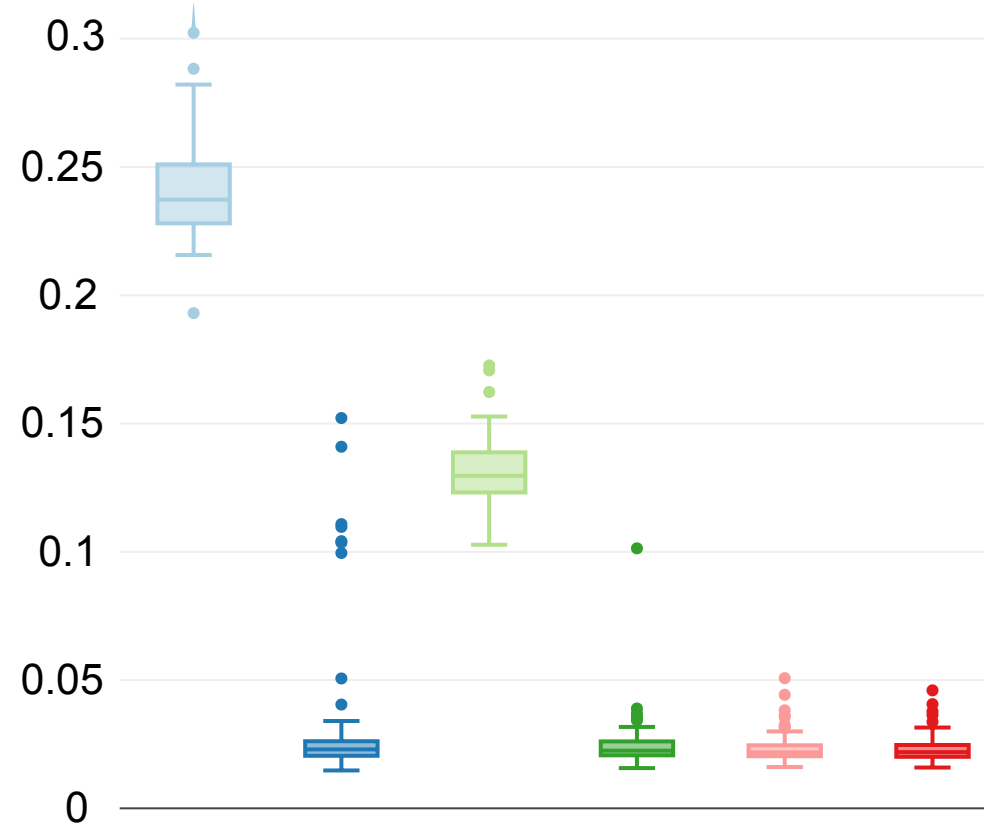

Weighted Steel and Penny

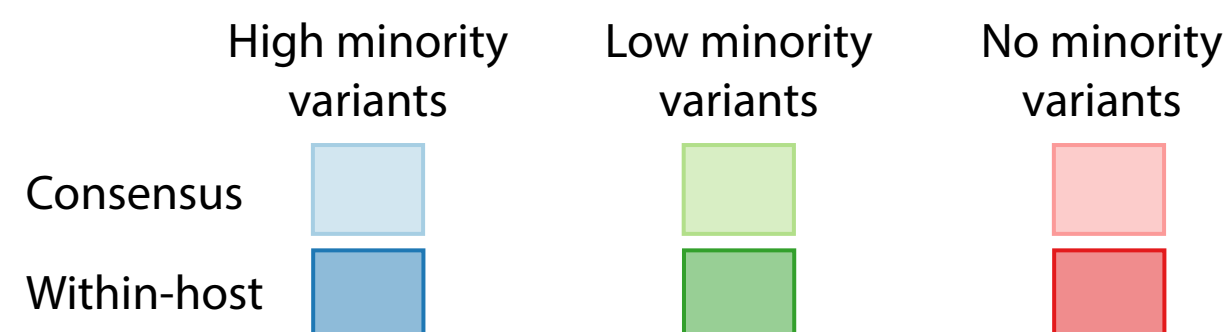

Supplement: supp [file elife-84384-supp-v1.zip]
