# Supplementary material for: Within-host diversity improves phylogenetic and transmission reconstruction of SARS-CoV-2 outbreaks
Source: eLife journal article supplement (doi:10.7554/elife.84384), 2023-09-21
Supplement: supp [file elife-84384-supp-v1.zip]

Allele frequency of isolate 2

**No relationship**

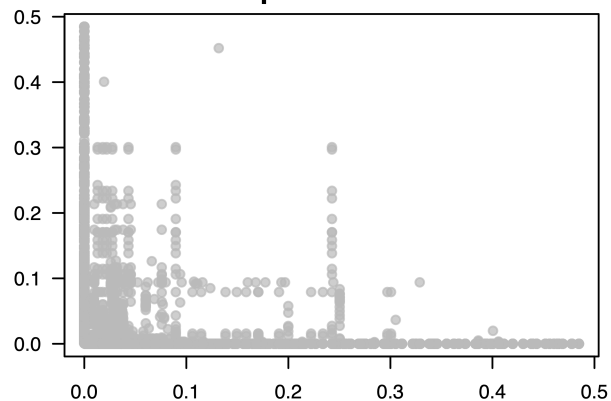

**Hospital**

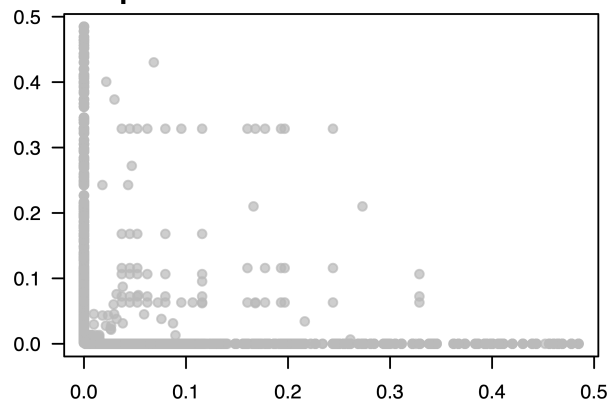

**Department**

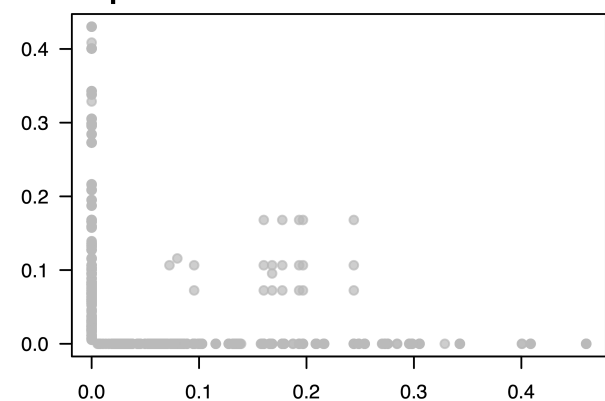

**Epidemiological**

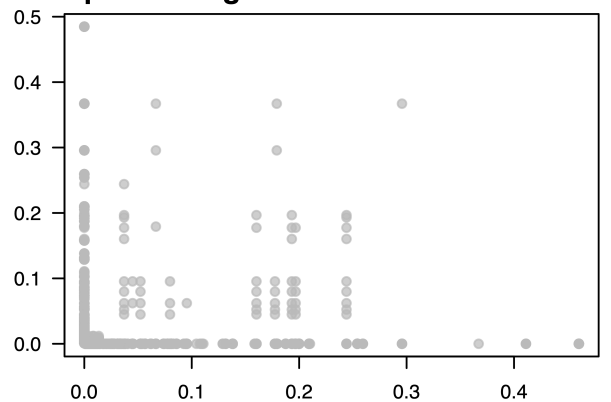

**Long. replicate**

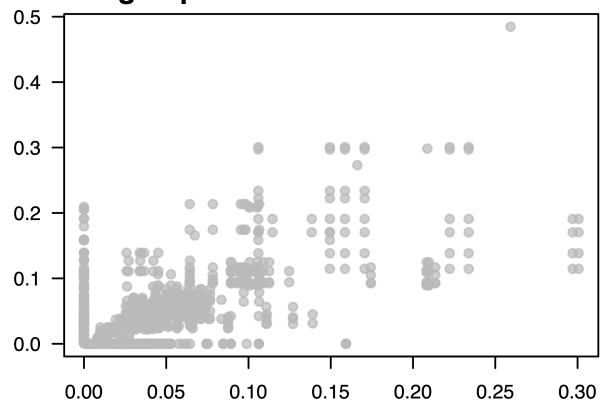

**Tech. replicate**

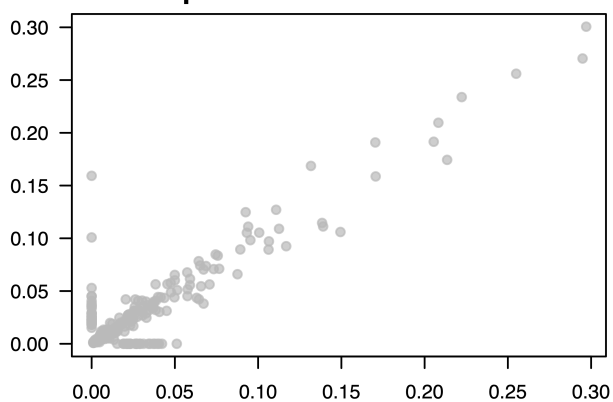

Allele frequency of isolate 1
