# Supplementary material for: Within-host diversity improves phylogenetic and transmission reconstruction of SARS-CoV-2 outbreaks
Source: eLife journal article supplement (doi:10.7554/elife.84384), 2023-09-21
Supplement: supp [file elife-84384-supp-v1.zip]

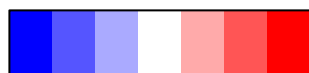

19 21 23 25 27 29 31

Ct value

• 1    ○ 10    ○ 100  
○ 5    ○ 20    ○ 200

Number of  
minor variants

LOND-D9B96

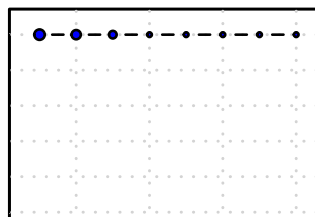

LOND-D9BA5

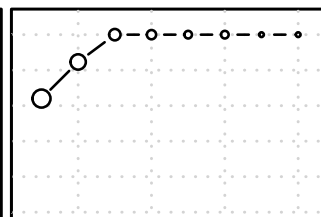

LOND-D9B0F

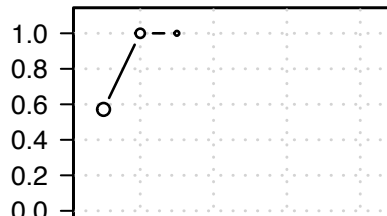

LOND-D9BB4

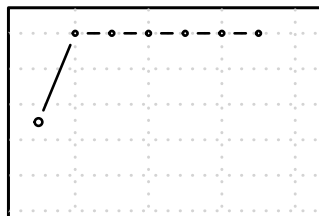

LOND-D9AF3

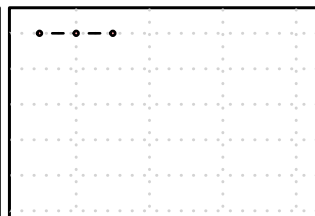

LOND-D9B1E

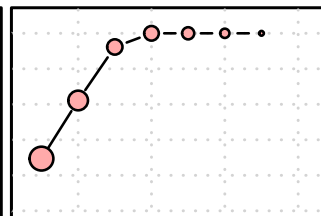

LOND-D9B2D

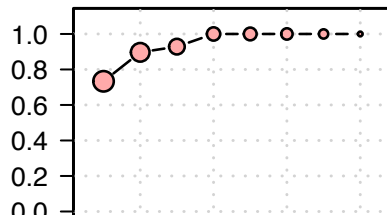

LOND-D9B3C

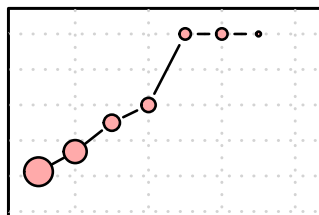

LOND-D9B4B

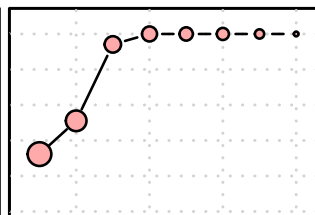

LOND-D9B5A

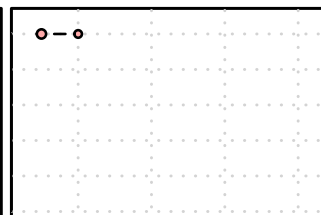

LOND-D9B69

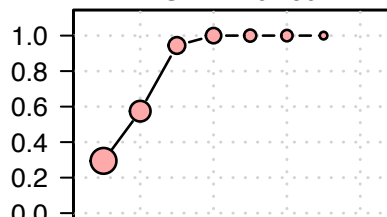

LOND-D9B78

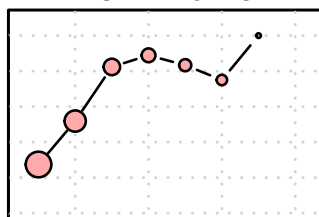

LOND-D9BC3

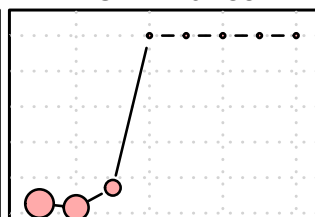

LOND-D9B87

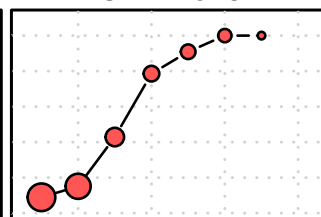

LOND-D9BD2

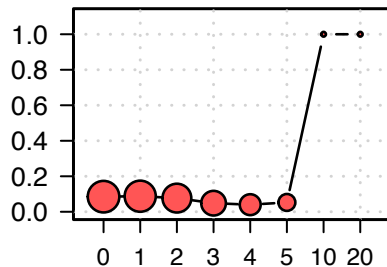

LOND-D9BE1

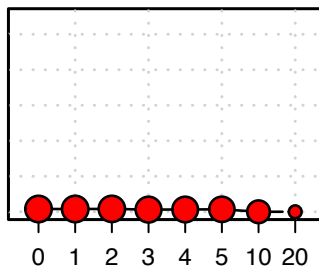

LOND-D9BF0

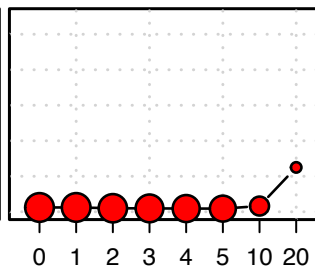

0 1 2 3 4 5 10 20

Proportion of shared minor variants

Minimum allele frequency (%)
