# Supplementary figures and images for: Within-host diversity improves phylogenetic and transmission reconstruction of SARS-CoV-2 outbreaks
Source: eLife journal article supplement (doi:10.7554/elife.84384), 2023-09-21

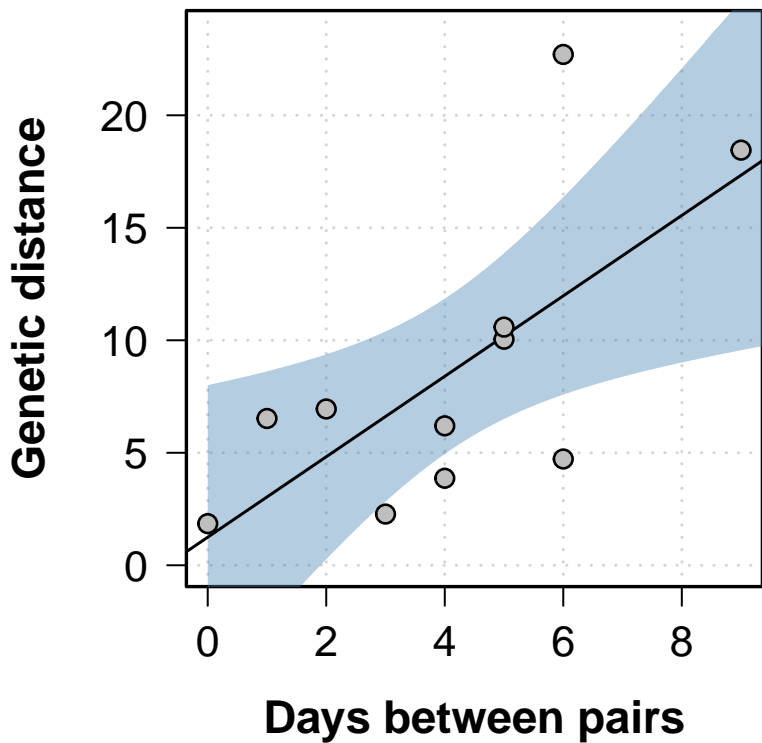

Supplement: supp [file elife-84384-supp-v1.zip]

**a**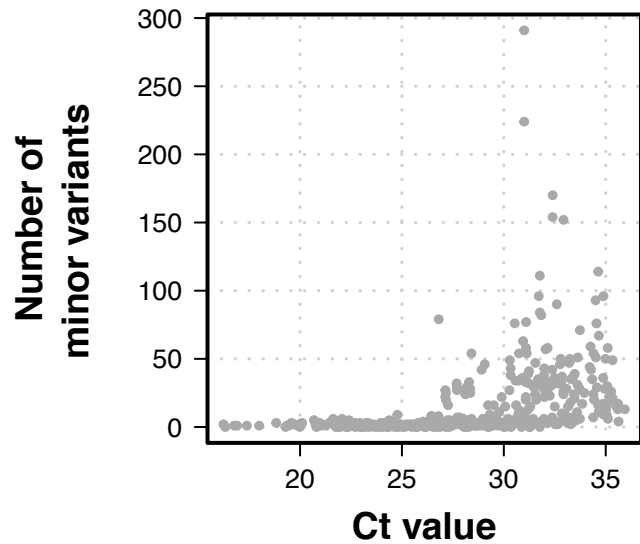**b**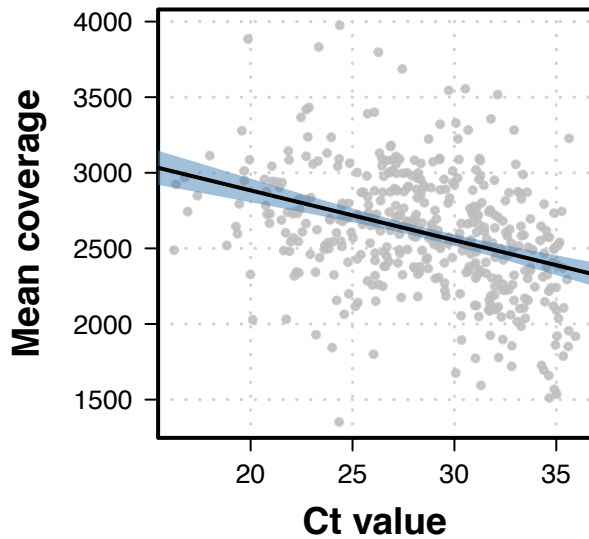

Supplement: supp [file elife-84384-supp-v1.zip]

**Frequency**

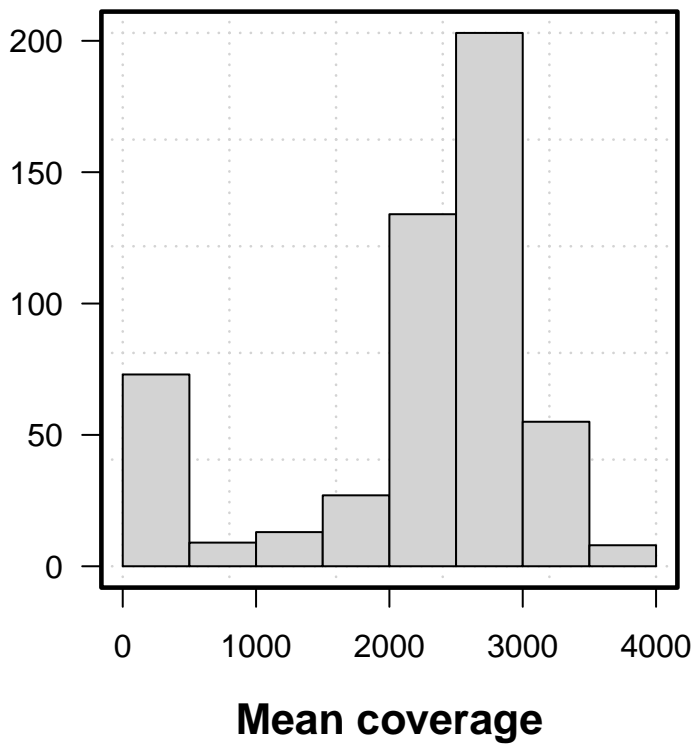

Supplement: supp [file elife-84384-supp-v1.zip]

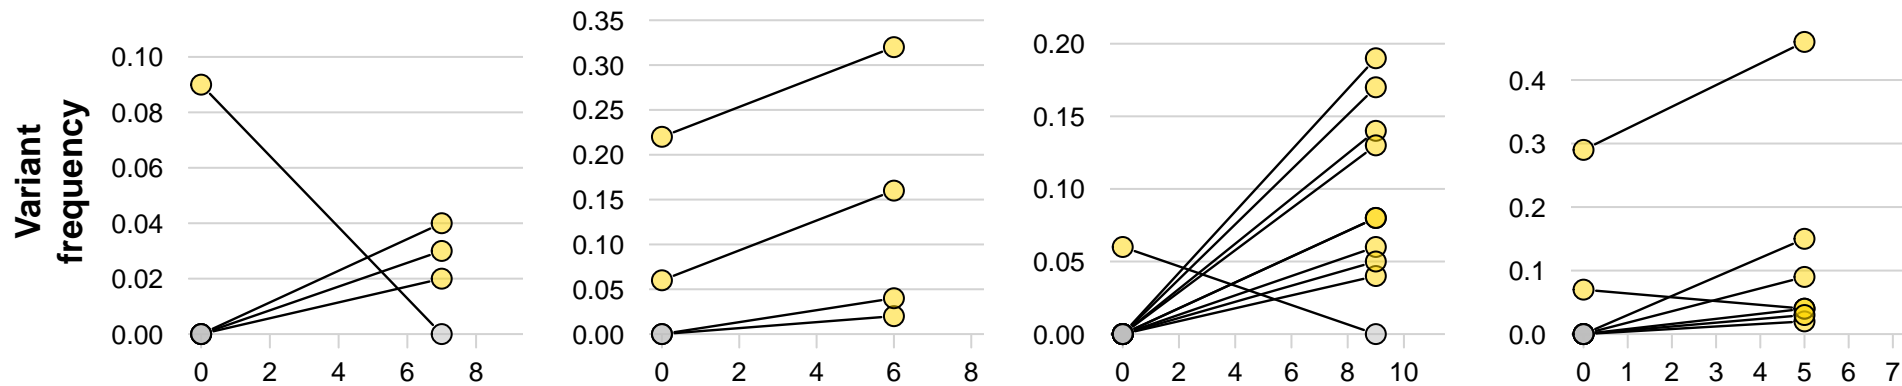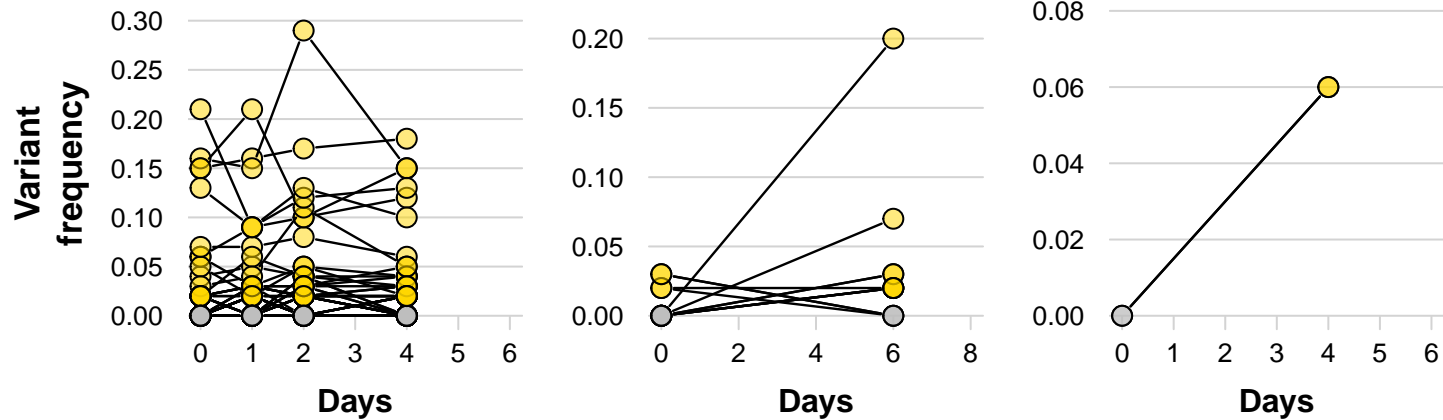

Supplement: supp [file elife-84384-supp-v1.zip]

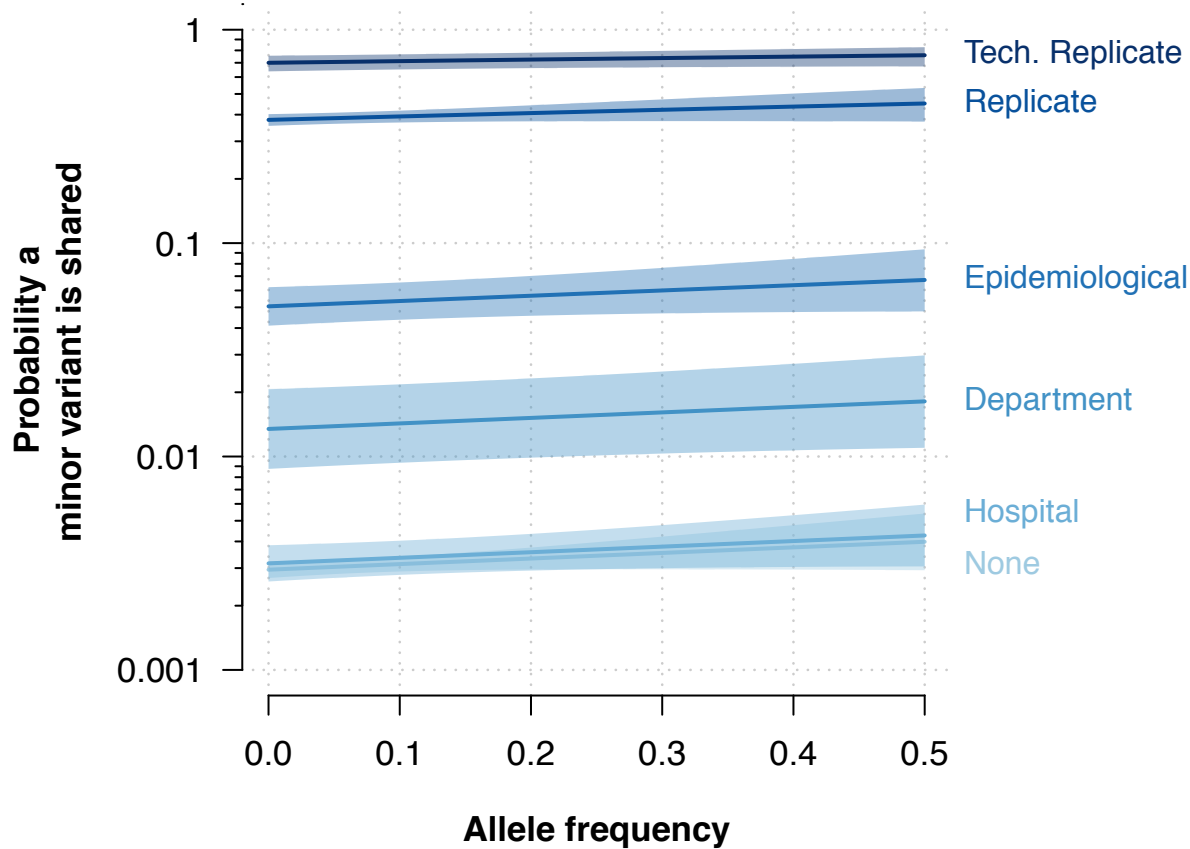

Supplement: supp [file elife-84384-supp-v1.zip]

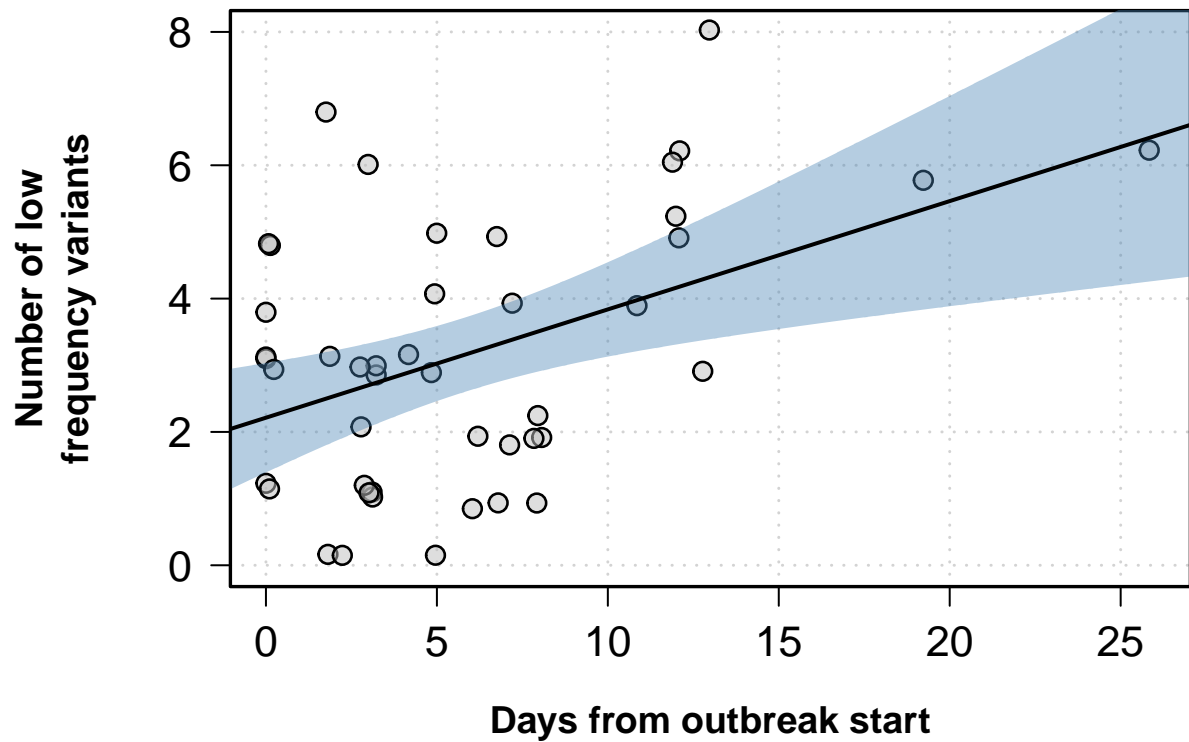

Supplement: supp [file elife-84384-supp-v1.zip]

**a**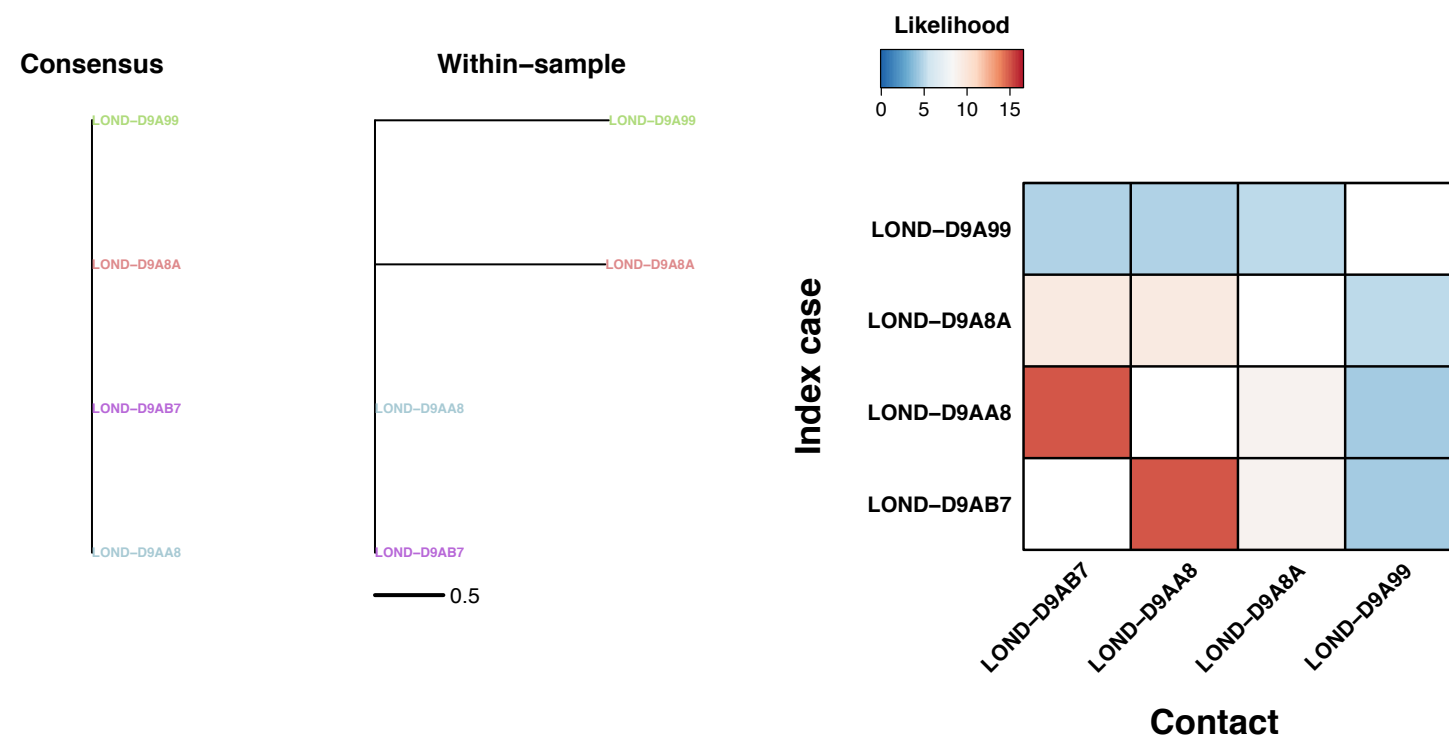**b**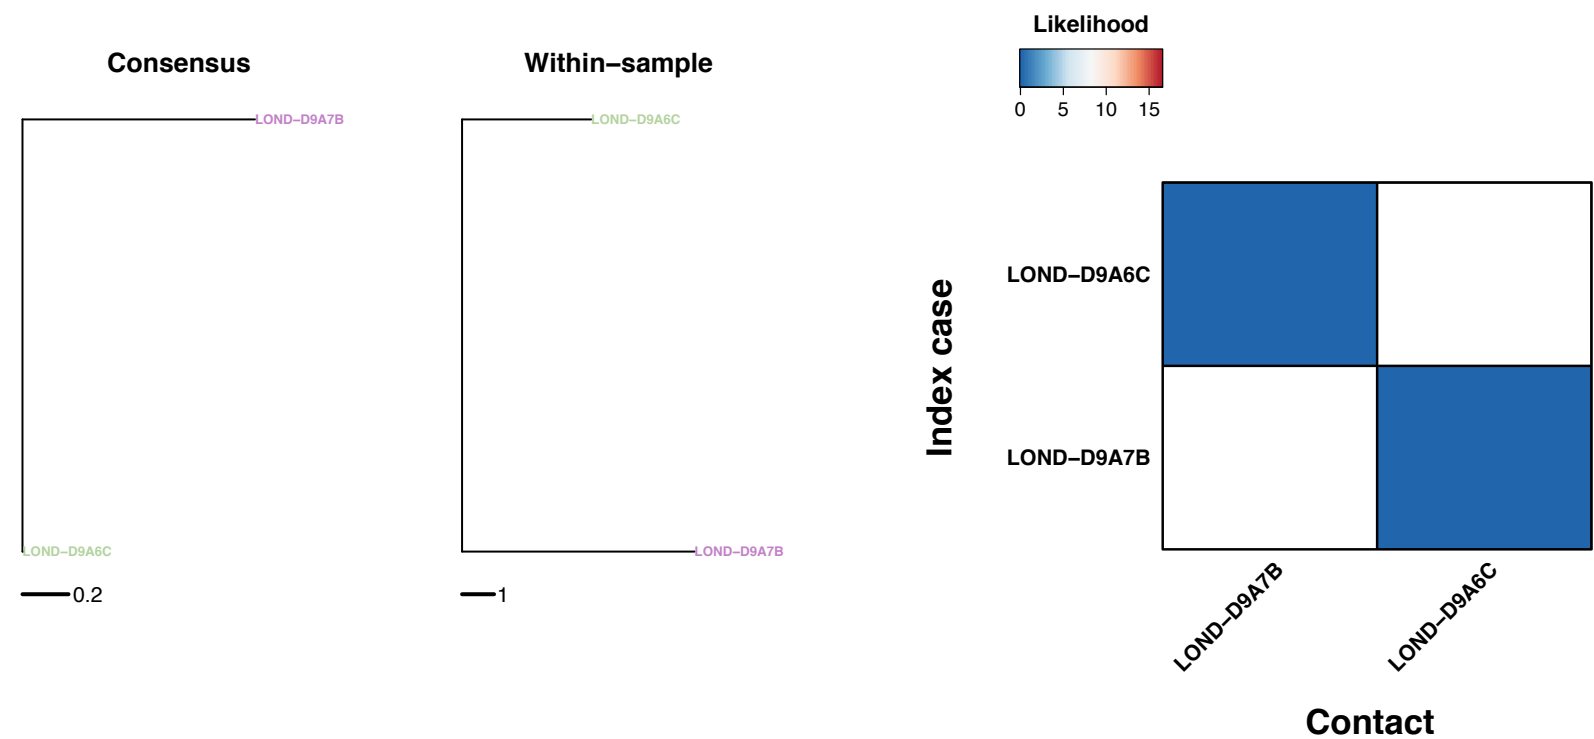**c**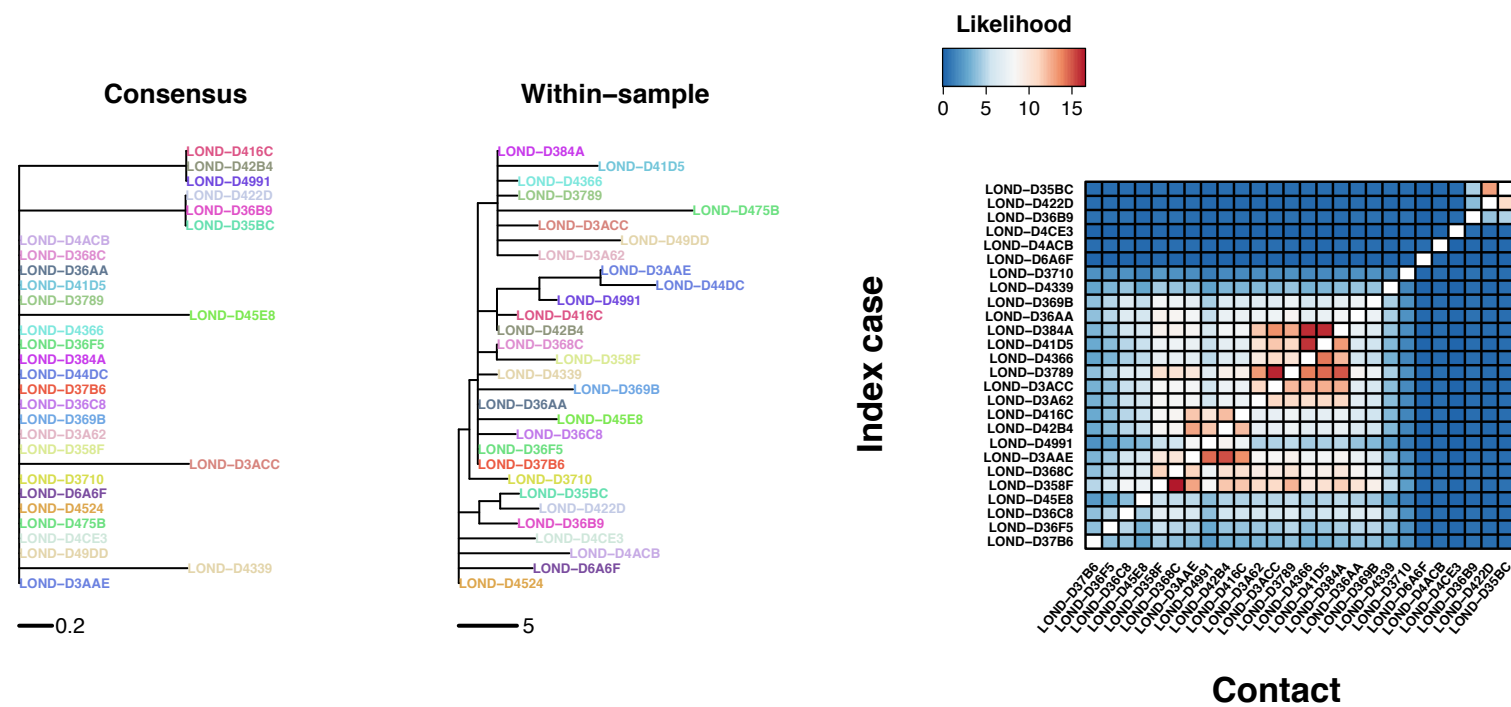**d**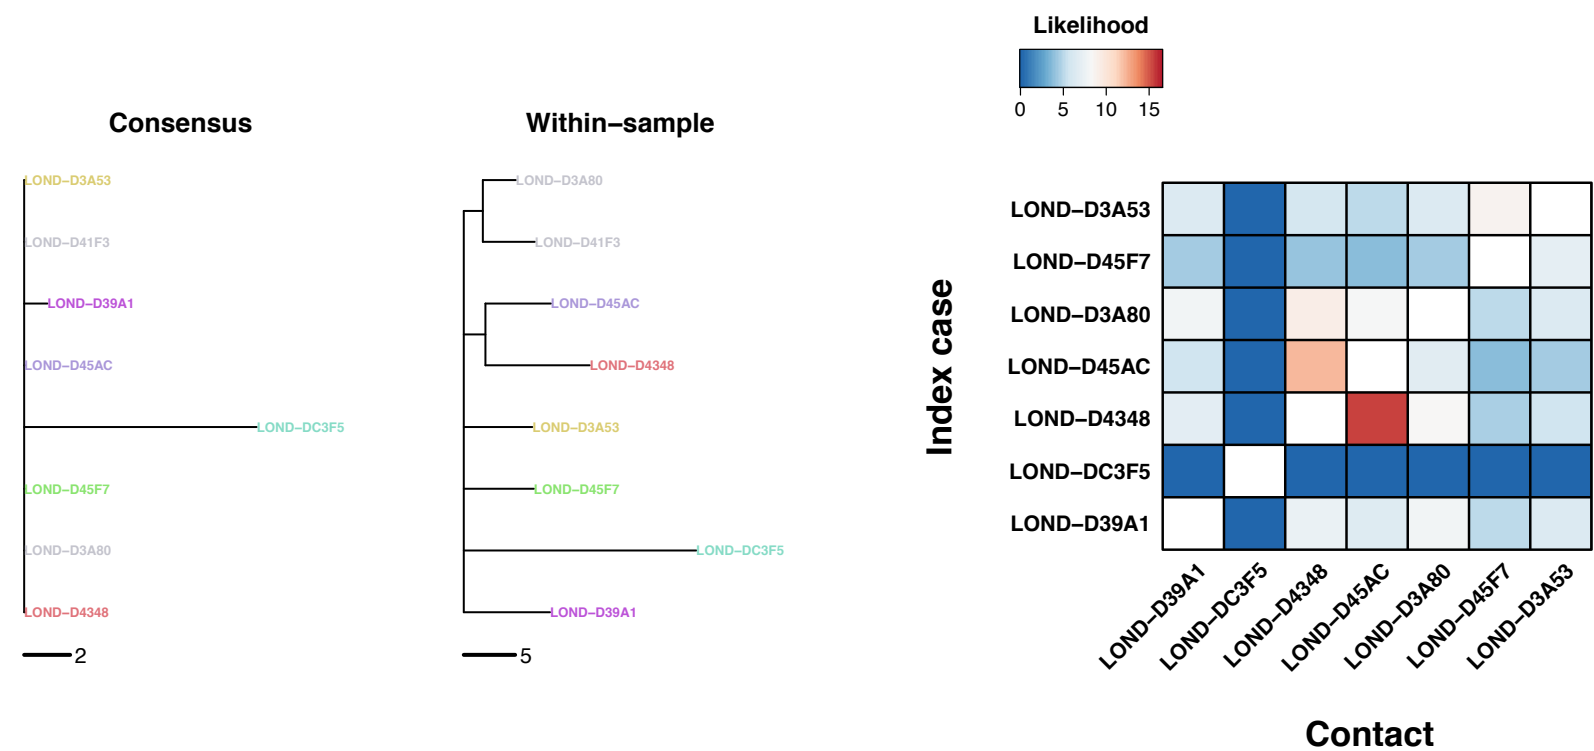

Supplement: supp [file elife-84384-supp-v1.zip]

**Consensus tree**

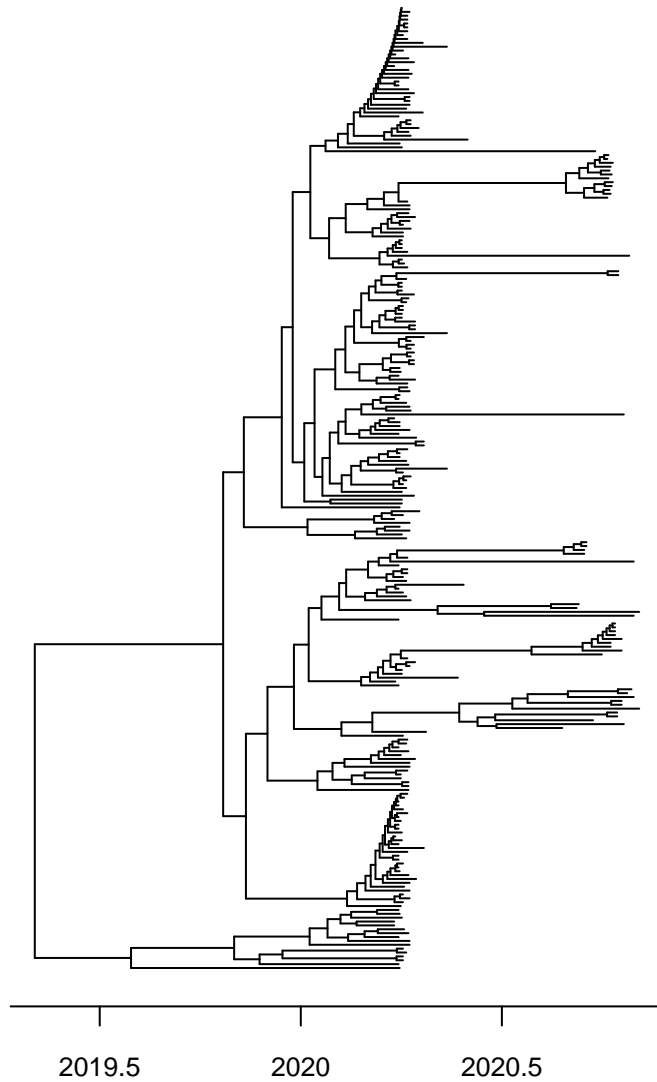

**Within-sample tree**

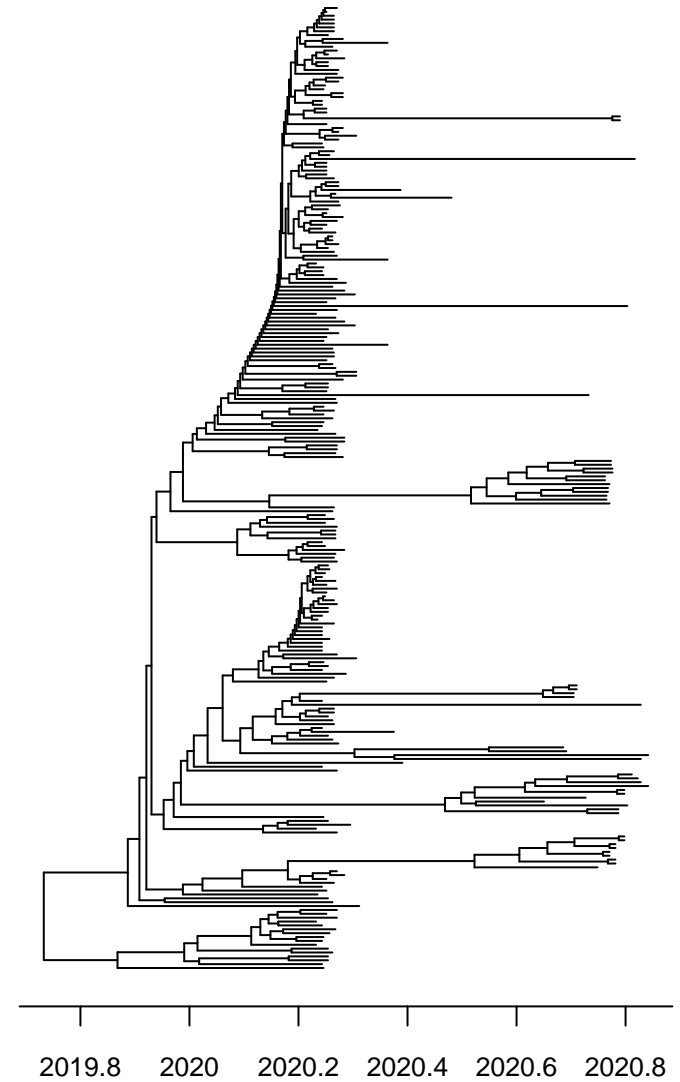

Supplement: supp [file elife-84384-supp-v1.zip]

**a**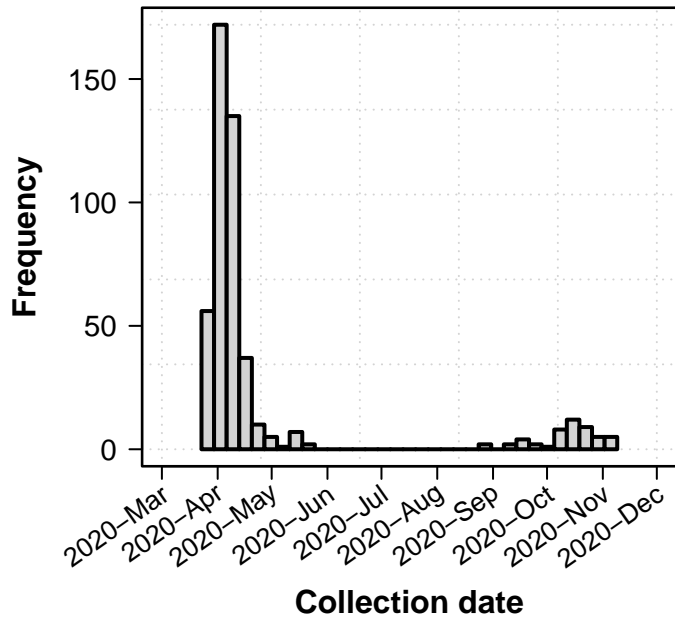**b**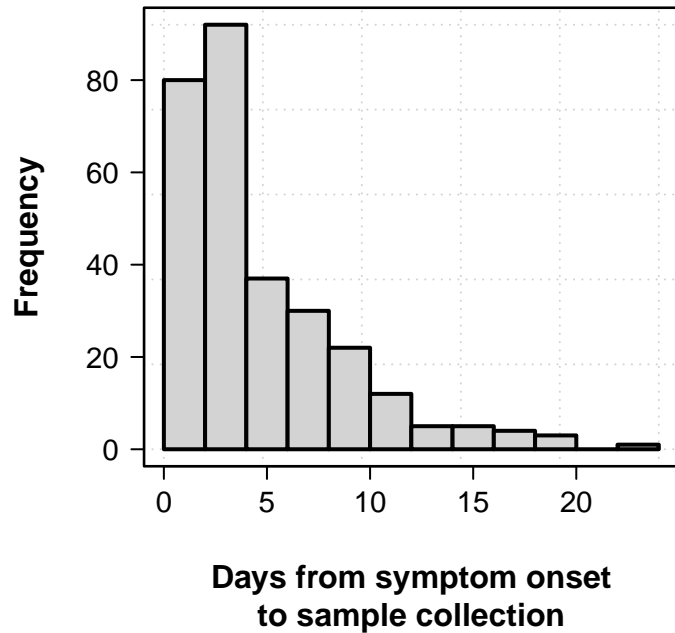

Supplement: supp [file elife-84384-supp-v1.zip]

**Consensus tree**

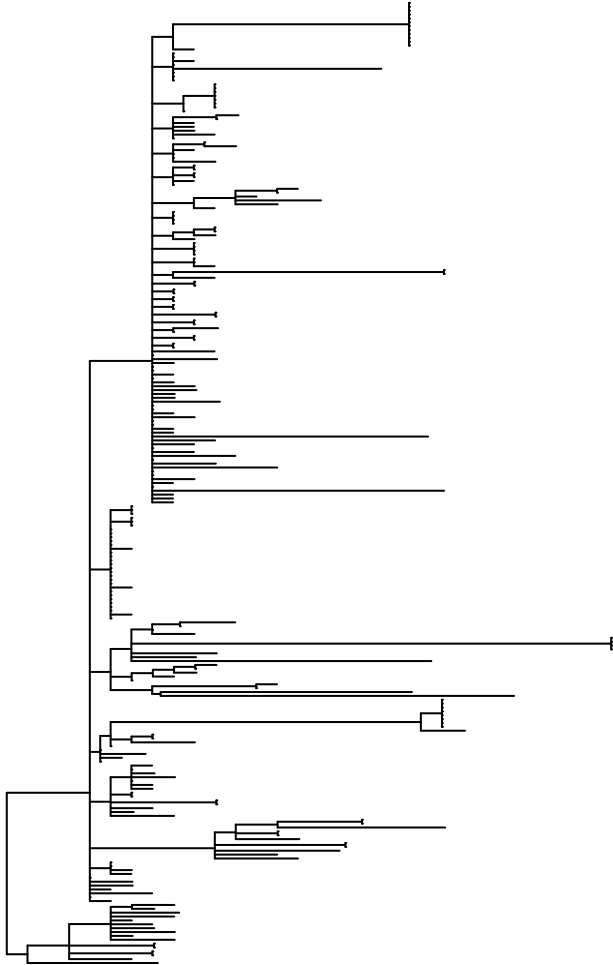

**Within-sample tree**

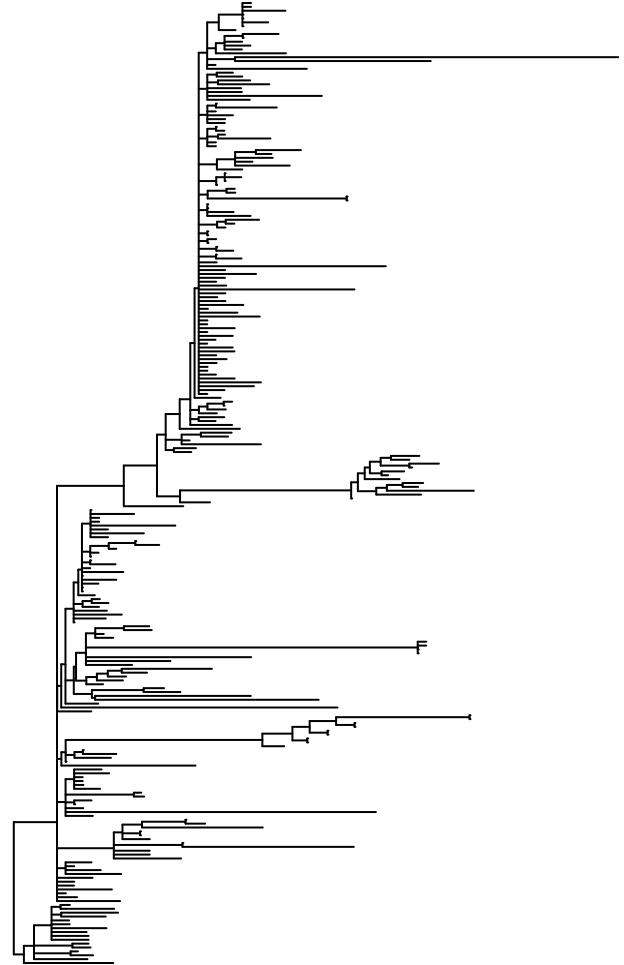

Supplement: supp [file elife-84384-supp-v1.zip]
